# Supplementary material
Source: Research Square preprint supplement (doi:10.21203/rs.3.rs-9921505/v1)
Supplement: Supplementary file 1 [file f48bc89b65941cd889312fa0.pdf]

Supplementary Information for “NMRPeak: a ready-to-use intelligent system for molecular structure elucidation enabled by synergistic cross-modal learning”

Fanjie Xu<sup>1,2,3</sup>, Jinyuan Hu<sup>2,4</sup>, Jingxiang Zou<sup>4</sup>, Junjie Wang<sup>3,5</sup>,  
Boying Huang<sup>6</sup>, Zhifeng Gao<sup>3,7</sup>, Xiaohong Ji<sup>3,7\*</sup>, Weinan E<sup>7,8,9</sup>,  
Zhong-Qun Tian<sup>2,4</sup>, Fujie Tang<sup>6,1,4\*</sup>, Jun Cheng<sup>2,1,4\*</sup>

<sup>1\*</sup>Institute of Artificial Intelligence, Xiamen University, Xiamen, 361005, China.

<sup>2</sup>State Key Laboratory of Physical Chemistry of Solid Surfaces, iChEM, College of Chemistry and Chemical Engineering, Xiamen University, Xiamen, 361005, China.

<sup>3</sup>DP Technology, Beijing, 100080, China.

<sup>4</sup>Laboratory of AI for Electrochemistry (AI4EC), Tan Kah Kee Innovation Laboratory (IKKEM), Xiamen, 361005, China.

<sup>5</sup>College of Chemistry and Molecular Engineering, Peking University, Beijing, 100871, China.

<sup>6</sup>Pen-Tung Sah Institute of Micro-Nano Science and Technology, Discipline of Intelligent Instrument and Equipment, iChEM, Xiamen University, Xiamen, 361005, China.

<sup>7</sup>AI for Science Institute, Beijing, 100080, China.

<sup>8</sup>Center for Machine Learning Research, Peking University, Beijing, 100871, China.

<sup>9</sup>School of Mathematical Sciences, Peking University, Beijing, 100871, China.

\*Corresponding author(s). E-mail(s): [jixh@dp.tech](mailto:jixh@dp.tech); [tangfujie@xmu.edu.cn](mailto:tangfujie@xmu.edu.cn);  
[chengjun@xmu.edu.cn](mailto:chengjun@xmu.edu.cn);

# 1 Contents

|    |                                                                                          |          |
|----|------------------------------------------------------------------------------------------|----------|
| 2  | <b>Supplementary Notes</b>                                                               | <b>3</b> |
| 3  | Supplementary Note 1. Configuration of the unified token vocabulary. . . . .             | 3        |
| 4  | Supplementary Note 2. Implementation of NMRPeak-P model variants. . . . .                | 3        |
| 5  | Supplementary Note 3. Token representation of <sup>1</sup> H NMR spectral peaks. . . . . | 4        |
| 6  | Supplementary Note 4. Model size configuration and computational cost. . . . .           | 4        |
| 7  | Supplementary Note 5. Effect of beam size on generation performance. . . . .             | 4        |
| 8  | <b>Supplementary Figures</b>                                                             | <b>5</b> |
| 9  | Supplementary Figure 1. Contribution of individual similarity metrics of NMRPeak-R.      | 5        |
| 10 | Supplementary Figure 2. Contribution of individual similarity metrics of NMRPeak-G.      | 5        |
| 11 | <b>Supplementary Tables</b>                                                              | <b>7</b> |
| 12 | Supplementary Table 1. Data statistics of the MST-NMR dataset across training,           |          |
| 13 | validation, and test splits. . . . .                                                     | 7        |
| 14 | Supplementary Table 2. Data statistics of the NMRexp dataset across training,            |          |
| 15 | validation, and test splits. . . . .                                                     | 7        |
| 16 | Supplementary Table 3. Discretization strategy for numerical tokens in the NMRPeak       |          |
| 17 | tokenizer. . . . .                                                                       | 7        |
| 18 | Supplementary Table 4. Discretization strategy for categorical tokens in the             |          |
| 19 | NMRPeak tokenizer. . . . .                                                               | 8        |
| 20 | Supplementary Table 5. Hyperparameter configurations for the NMRPeak system              |          |
| 21 | modules. . . . .                                                                         | 8        |
| 22 | Supplementary Table 6. Comparison of peak-aware similarity scores for NMRPeak-           |          |
| 23 | P-Single and NMRPeak-P-Multi on the NMRexp test set. . . . .                             | 8        |
| 24 | Supplementary Table 7. Top- <i>k</i> molecular generation accuracy using ground-truth    |          |
| 25 | spectra (NMRexp), NMRPeak-P-Single, and NMRPeak-P-Multi as inputs to                     |          |
| 26 | the frozen NMRPeak-G model. . . . .                                                      | 9        |
| 27 | Supplementary Table 8. Molecule-to-spectrum (M2S) retrieval accuracy of different        |          |
| 28 | scoring variants in NMRPeak-R. . . . .                                                   | 9        |
| 29 | Supplementary Table 9. Spectrum-to-molecule (S2M) retrieval accuracy of different        |          |
| 30 | scoring variants in NMRPeak-R. . . . .                                                   | 10       |
| 31 | Supplementary Table 10. Generation accuracy of NMRPeak-G with beam size = 100            |          |
| 32 | on the NMRexp test set. . . . .                                                          | 11       |
| 33 | Supplementary Table 11. Generation accuracy of NMRPeak-G with beam size = 10,            |          |
| 34 | trained on MST-NMR dataset and evaluated on the MST-NMR test set. . . . .                | 11       |
| 35 | Supplementary Table 12. Generation accuracy of NMRPeak-G with beam size = 10,            |          |
| 36 | trained on MST-NMR dataset and evaluated on the NMRexp test set. . . . .                 | 11       |
| 37 | Supplementary Table 13. Generation accuracy of NMRPeak-G with beam size = 10,            |          |
| 38 | trained on NMRexp dataset and evaluated on the NMRexp test set. . . . .                  | 14       |
| 39 | Supplementary Table 14. Generation accuracy of NMRPeak-G with beam size = 10,            |          |
| 40 | trained on NMRexp dataset and evaluated on the NMRexp test set simulated                 |          |
| 41 | by NMRPeak-P-Single. . . . .                                                             | 14       |
| 42 | Supplementary Table 15. Generation accuracy of NMRPeak-G with beam size = 10,            |          |
| 43 | trained on NMRexp dataset and evaluated on the NMRexp test set simulated                 |          |
| 44 | by NMRPeak-P-Multi. . . . .                                                              | 14       |

## 45 Supplementary Notes

### 46 Supplementary Note 1. Configuration of the unified token vocabulary.

47 To facilitate synergistic cross-modal learning, we developed a unified vocabulary for the BART-  
48 based [1] architecture, encompassing spectral features, molecular formulas, and structural  
49 representations. The total vocabulary for the BART modules consists of **2,954** distinct tokens,  
50 categorized as follows:

- 51 • **Numerical Tokens (2,380)**: These tokens represent discretized  $^{13}\text{C}$  and  $^1\text{H}$  chemical shifts,  
52 as well as  $^1\text{H}$  coupling constants. The detailed interval partitioning and step sizes, including  
53 boundary tokens for out-of-range values, are provided in **Supplementary Table 3**.
- 54 • **Categorical Tokens (409)**: This set includes 140  $^1\text{H}$  NMR multiplicity patterns, 50 proton  
55 integration levels, 118 element types, 99 atom counts, and 2 specific charge state tokens.  
56 For a complete list of categorical definitions, refer to **Supplementary Table 4**.
- 57 • **SMILES Tokens (158)**: These are generated using the Smirk-based [2] tokenization  
58 method.
- 59 • **Special Tokens (7)**: These include standard linguistic markers ([CLS], [PAD], [SEP],  
60 [UNK], [MASK]) and modality-specific boundary tokens (cnmr\_end, hnmr\_end) used to  
61 delineate spectral segments and maintain sequence order during training and inference.

62 In contrast, the **Uni-Mol** [3] molecule encoder, which is utilized to understand 3D  
63 conformational information, maintains its original specialized vocabulary of **31** tokens.

### 64 Supplementary Note 2. Implementation of NMRPeak-P model 65 variants.

66 To ensure the robustness and accuracy of forward spectrum prediction, we implemented two  
67 variants of the prediction module: **NMRPeak-P-Single** and **NMRPeak-P-Multi**. The  
68 configurations for their model selection and ensemble strategy are as follows:

- 69 • **NMRPeak-P-Single**: This baseline variant utilizes the single best-performing checkpoint  
70 identified during the training process. The optimal model is selected by maximizing the  
71 `token_acc` metric on the validation set of the curated experimental NMRexp [4] dataset.
- 72 • **NMRPeak-P-Multi**: This ensemble variant leverages a multi-model consensus approach  
73 to mitigate prediction variance and capture a broader distribution of spectral signatures.  
74 Specifically, we utilize ten independent checkpoints saved at regular intervals during the sta-  
75 ble convergence phase of training, corresponding to steps 200,000, 250,000, 300,000, 400,000,  
76 500,000, 600,000, 700,000, 800,000, 900,000, and 1,000,000.
- 77 • **Ensemble Strategy**: For each input molecular structure, the ten models in the ensemble  
78 independently generate candidate spectral token sequences. These candidates are subse-  
79 quently aggregated and re-ranked using the molecule-to-spectrum ranking function of the  
80 NMRPeak-R module.

81 **Supplementary Note 3. Token representation of  $^1\text{H}$  NMR spectral**  
82 **peaks.**

83 To accurately capture the spectral profile of  $^1\text{H}$  NMR signals, which often appear as multiplet  
84 ranges rather than single sharp resonances, we utilize a dual-token representation strategy for  
85 each peak. For experimental peaks reported with defined boundaries, the tokenizer converts  
86 the maximum chemical shift and the minimum chemical shift into two corresponding numerical  
87 tokens. These tokens are appended sequentially to the peak’s token set, preserving the inherent  
88 width of the multiplet signal. In scenarios where specific range boundaries are unavailable,  
89 the system fallbacks to the peak’s centroid chemical shift. To maintain a consistent sequence  
90 length and structural representation across all  $^1\text{H}$  signals, the centroid token is duplicated  
91 and appended twice. This ensures that the downstream transformer architecture processes a  
92 uniform input dimensionality regardless of the raw data format.

93 **Supplementary Note 4. Model size configuration and computational**  
94 **cost.**

95 To investigate the impact of model scale on performance, we additionally evaluated larger  
96 model configurations for the NMRPeak system modules, including NMRPeak-P, NMRPeak-  
97 R, and NMRPeak-G. The detailed hyperparameter settings of the base configurations used in  
98 this work are summarized in Supplementary Table 5.

99 Empirical results indicate that large-scale configurations consistently yield improved per-  
100 formance compared to their base counterparts, primarily due to increased model capacity  
101 and representational power. However, these performance gains come at the cost of substan-  
102 tially higher computational overhead, including longer training time, increased GPU memory  
103 consumption, and reduced training efficiency.

104 Considering the trade-off between performance and computational cost, we adopt the  
105 base configurations for all experiments reported in this work. This choice ensures competitive  
106 performance while maintaining reasonable training time and resource requirements.

107 **Supplementary Note 5. Effect of beam size on generation**  
108 **performance.**

109 To assess the influence of decoding strategy on molecular generation, we evaluated NMRPeak-  
110 G with different beam sizes. The detailed stereochemistry-aware generation accuracies for  
111 beam size = 10 and beam size = 100 are summarized in Supplementary Table 10 and Supple-  
112 mentary Table 15, respectively. We observe that increasing the beam size generally improves  
113 Top-1 accuracy, as a larger beam allows the decoder to explore a broader candidate space and  
114 increases the likelihood that the correct structure appears among the highest-ranked candi-  
115 dates. In particular, a larger beam size enhances the probability that correct molecules are  
116 promoted to earlier candidate positions during decoding. However, the overall performance  
117 differences between beam size = 10 and beam size = 100 remain relatively small. This sug-  
118 gests that the generation model already captures strong structural priors, and that moderate  
119 beam sizes are sufficient to achieve competitive performance. Considering the trade-off between  
120 decoding efficiency and marginal accuracy gains, beam size = 10 provides a practical balance  
121 between computational cost and generation quality.

122 **Supplementary Figures**

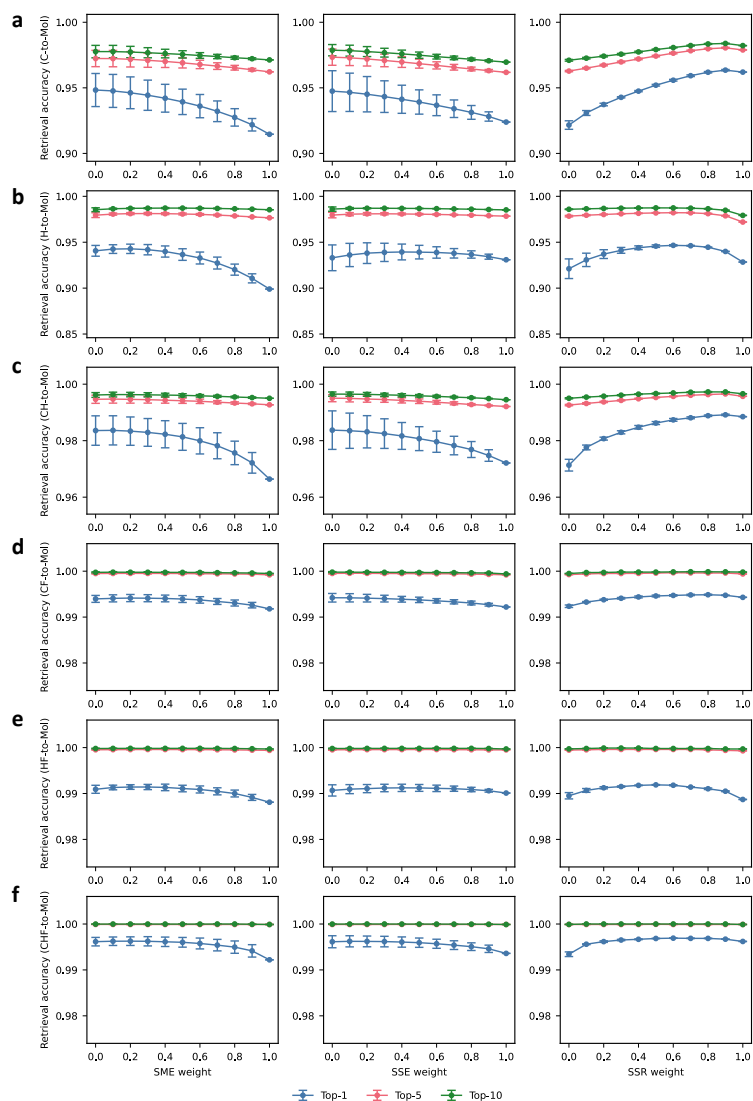

**Supplementary Figure. 1. Contribution of individual similarity metrics of NMRPeak-R.** a–f, Impact of weight variations for each component on retrieval accuracy across diverse configurations, with data points and error bars representing the mean and variance, respectively. For all panels, SME, SSE, and SSR denote spectrum-to-molecule embedding, spectrum-to-spectrum embedding, and spectrum-to-spectrum rule-based similarity, respectively. C and H correspond to  $^{13}\text{C}$  and  $^1\text{H}$  NMR peaks, and F denotes molecular formula constraints.

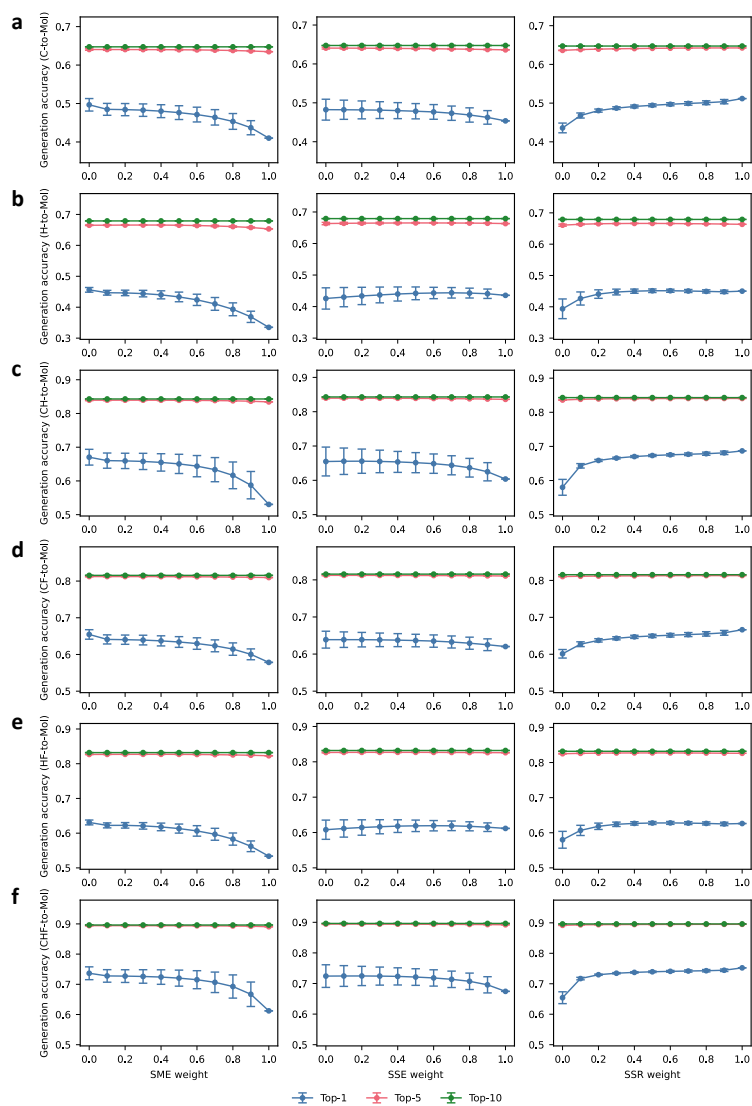

**Supplementary Figure 2. Contribution of individual similarity metrics of NMRPeak-G.** a–f, Impact of weight variations for each component on generation accuracy across diverse configurations, with data points and error bars representing the mean and variance, respectively. For all panels, SME, SSE, and SSR denote spectrum-to-molecule embedding, spectrum-to-spectrum embedding, and spectrum-to-spectrum rule-based similarity, respectively. C and H correspond to  $^{13}\text{C}$  and  $^1\text{H}$  NMR peaks, and F denotes molecular formula constraints.

123 **Supplementary Tables****Supplementary Table 1.** Data statistics of the MST-NMR [5] dataset across training, validation, and test splits.

| Split        | All samples | $^{13}\text{C}$ | $^1\text{H}$ | $^{13}\text{C}$ & $^1\text{H}$ |
|--------------|-------------|-----------------|--------------|--------------------------------|
| Train        | 679,186     | 679,186         | 679,186      | 679,186                        |
| Valid        | 35,747      | 35,747          | 35,747       | 35,747                         |
| Test         | 79,437      | 79,437          | 79,437       | 79,437                         |
| Full dataset | 794,370     | 794,370         | 794,370      | 794,370                        |

**Supplementary Table 2.** Data statistics of the NMRexp [4] dataset across training, validation, and test splits.

| Split        | All samples | $^{13}\text{C}$ | $^1\text{H}$ | $^{13}\text{C}$ & $^1\text{H}$ |
|--------------|-------------|-----------------|--------------|--------------------------------|
| Train        | 920,796     | 786,240         | 805,224      | 670,668                        |
| Valid        | 48,463      | 41,383          | 42,366       | 35,286                         |
| Test         | 107,696     | 91,830          | 94,163       | 78,297                         |
| Full dataset | 1,076,955   | 919,453         | 941,753      | 784,251                        |

**Supplementary Table 3.** Discretization strategy for numerical tokens in the NMRPeak tokenizer. Different regions and step sizes are defined for  $^{13}\text{C}$  chemical shift,  $^1\text{H}$  chemical shift, and  $^1\text{H}$  coupling constants.

| Type                                                   | Region                                      | Step size | Tokens      |
|--------------------------------------------------------|---------------------------------------------|-----------|-------------|
| <b><math>^{13}\text{C}</math> chemical shift (ppm)</b> |                                             |           |             |
|                                                        | $(-\infty, -6)$                             | -         | 1           |
|                                                        | $(-6, 0)$                                   | 0.5       | 12          |
|                                                        | $(0, 200)$                                  | 0.1       | 2000        |
|                                                        | $(200, 210)$                                | 0.5       | 20          |
|                                                        | $(210, 220)$                                | 1.0       | 10          |
|                                                        | $(220, 250)$                                | 30.0      | 1           |
|                                                        | $(250, \infty)$                             | -         | 1           |
|                                                        | Total $^{13}\text{C}$ chemical shift tokens | -         | 2045        |
| <b><math>^1\text{H}</math> chemical shift (ppm)</b>    |                                             |           |             |
|                                                        | $(-\infty, -1)$                             | -         | 1           |
|                                                        | $(-1, 0)$                                   | 0.1       | 10          |
|                                                        | $(0, 12)$                                   | 0.05      | 240         |
|                                                        | $(12, 13)$                                  | 0.1       | 10          |
|                                                        | $(13, 14)$                                  | 0.2       | 5           |
|                                                        | $(14, 16)$                                  | 0.5       | 4           |
|                                                        | $(16, \infty)$                              | -         | 1           |
|                                                        | Total $^1\text{H}$ chemical shift tokens    | -         | 271         |
| <b><math>^1\text{H}</math> coupling constant (Hz)</b>  |                                             |           |             |
|                                                        | $(0, 20)$                                   | 0.5       | 40          |
|                                                        | $(20, 30)$                                  | 1.0       | 10          |
|                                                        | $(30, 50)$                                  | 2.0       | 10          |
|                                                        | $(50, 60)$                                  | 5.0       | 2           |
|                                                        | $(60, 300)$                                 | 240.0     | 1           |
|                                                        | $(300, \infty)$                             | -         | 1           |
|                                                        | Total $^1\text{H}$ coupling constant tokens | -         | 64          |
| <b>Total numerical tokens</b>                          |                                             |           | <b>2380</b> |

**Supplementary Table 4.** Discretization strategy for categorical tokens in the NMRPeak tokenizer. These tokens represent discrete chemical attributes and symbolic information, now including molecular charge states.

| Category                                 | Definition / Range                                          | Tokens     |
|------------------------------------------|-------------------------------------------------------------|------------|
| <b><sup>1</sup>H NMR Peak Attributes</b> |                                                             |            |
| <i>Multiplicity</i>                      | 140 predefined splitting patterns (s, d, t, m, etc.)        | 140        |
| <i>Integration</i>                       | Integer integration values (proton counts) in range [1, 50] | 50         |
| <b>Molecular Formula Attributes</b>      |                                                             |            |
| <i>Element Type</i>                      | Atomic numbers for element identification in range [1, 118] | 118        |
| <i>Atom Count</i>                        | Number of atoms per element in range [2, 100]               | 99         |
| <i>Charge State</i>                      | Positive and negative                                       | 2          |
| <b>Total Categorical Tokens</b>          | (Excluding Special/Boundary Tokens)                         | <b>409</b> |

**Supplementary Table 5.** Hyperparameter configurations for the NMRPeak system modules (NMRPeak-P, NMRPeak-R, and NMRPeak-G).

| Hyperparameter          | NMRPeak-P                                                           | NMRPeak-R                                                           | NMRPeak-G                                                        |
|-------------------------|---------------------------------------------------------------------|---------------------------------------------------------------------|------------------------------------------------------------------|
| Architecture            | Uni-Mol [3] encoder <sup>a</sup><br>+ Bart [1] decoder <sup>b</sup> | Uni-Mol [3] encoder <sup>a</sup><br>+ Bart [1] encoder <sup>b</sup> | Bart [1] encoder <sup>b</sup><br>+ Bart [1] decoder <sup>b</sup> |
| Number of GPUs          | 8                                                                   | 1                                                                   | 8                                                                |
| Learning rate           | $3 \times 10^{-4}$                                                  | $3 \times 10^{-4}$                                                  | $3 \times 10^{-4}$                                               |
| Batch size              | 16                                                                  | 512                                                                 | 16                                                               |
| Contrastive temperature | -                                                                   | 0.1                                                                 | -                                                                |
| Warmup steps            | 60,000                                                              | 15,000                                                              | 60,000                                                           |
| Total steps             | 1,000,000                                                           | 250,000                                                             | 1,000,000                                                        |
| Dropout                 | 0                                                                   | 0                                                                   | 0                                                                |
| Update frequency        | 1                                                                   | 1                                                                   | 1                                                                |

<sup>a</sup> Load pretrained weights into the base architecture and unfreeze for training;

<sup>b</sup> Base architecture, trained from scratch.

**Supplementary Table 6.** Comparison of peak-aware similarity scores for NMRPeak-P-Single and NMRPeak-P-Multi on the NMRexp [4] test set.

| Nucleus Type    | NMRPeak-P-Single | NMRPeak-P-Multi |
|-----------------|------------------|-----------------|
| <sup>13</sup> C | 0.9384           | <b>0.9391</b>   |
| <sup>1</sup> H  | 0.9314           | <b>0.9321</b>   |

**Supplementary Table 7.** Top- $k$  molecular generation accuracy using ground-truth spectra (NMRexp), NMRPeak-P-Single, and NMRPeak-P-Multi as inputs to the frozen NMRPeak-G model.

| Spectral Type | Top- $k$ | NMRexp [4] | NMRPeak-P-Single | NMRPeak-P-Multi |
|---------------|----------|------------|------------------|-----------------|
| C             | Top-1    | 0.4227     | 0.4535           | <b>0.4620</b>   |
|               | Top-5    | 0.6116     | 0.6514           | <b>0.6620</b>   |
|               | Top-10   | 0.6475     | 0.6874           | <b>0.6974</b>   |
| CF            | Top-1    | 0.5893     | 0.6197           | <b>0.6256</b>   |
|               | Top-5    | 0.7898     | 0.8216           | <b>0.8293</b>   |
|               | Top-10   | 0.8155     | 0.8454           | <b>0.8526</b>   |
| H             | Top-1    | 0.4373     | 0.4909           | <b>0.4983</b>   |
|               | Top-5    | 0.6361     | 0.7034           | <b>0.7139</b>   |
|               | Top-10   | 0.6790     | 0.7439           | <b>0.7541</b>   |
| HF            | Top-1    | 0.6109     | 0.6600           | <b>0.6662</b>   |
|               | Top-5    | 0.8052     | 0.8501           | <b>0.8570</b>   |
|               | Top-10   | 0.8320     | 0.8737           | <b>0.8792</b>   |
| CH            | Top-1    | 0.6384     | 0.6801           | <b>0.6888</b>   |
|               | Top-5    | 0.8177     | 0.8593           | <b>0.8691</b>   |
|               | Top-10   | 0.8430     | 0.8820           | <b>0.8914</b>   |
| CHF           | Top-1    | 0.7129     | 0.7473           | <b>0.7542</b>   |
|               | Top-5    | 0.8779     | 0.9067           | <b>0.9112</b>   |
|               | Top-10   | 0.8963     | 0.9222           | <b>0.9261</b>   |

C and H correspond to  $^{13}\text{C}$  and  $^1\text{H}$  NMR peaks, respectively. F denotes molecular formula constraints.

**Supplementary Table 8.** Molecule-to-spectrum (M2S) retrieval accuracy of NMRPeak-R on the NMRexp [4] test set.

| Spectral Type | Variant       | Top-1  | Top-5  | Top-10 |
|---------------|---------------|--------|--------|--------|
| C             | NMRPeak-R-M2S | 0.9116 | 0.9617 | 0.9703 |
| H             | NMRPeak-R-M2S | 0.8981 | 0.9764 | 0.9854 |

C and H correspond to  $^{13}\text{C}$  and  $^1\text{H}$  NMR spectra, respectively.

**Supplementary Table 9.** Spectrum-to-molecule (S2M) retrieval accuracy of different scoring variants in NMRPeak-R.

| Spectral Type | Variant                                               | Top-1         | Top-5         | Top-10        |
|---------------|-------------------------------------------------------|---------------|---------------|---------------|
| C             | NMRPeak-R-S2M-SME                                     | 0.9146        | 0.9622        | 0.9713        |
|               | NMRPeak-R-S2M-SSE                                     | 0.9239        | 0.9618        | 0.9696        |
|               | NMRPeak-R-S2M-SSR                                     | 0.9620        | 0.9789        | 0.9822        |
|               | NMRPeak-R-S2M-Combine (0.1,0.0,0.9)                   | <b>0.9640</b> | <b>0.9809</b> | <b>0.9841</b> |
| CF            | NMRPeak-R-S2M-SME                                     | 0.9918        | 0.9992        | 0.9995        |
|               | NMRPeak-R-S2M-SSE                                     | 0.9922        | 0.9992        | 0.9994        |
|               | NMRPeak-R-S2M-SSR                                     | 0.9943        | 0.9994        | 0.9998        |
|               | NMRPeak-R-S2M-Combine (0.2,0.0,0.8)                   | <b>0.9950</b> | <b>0.9996</b> | <b>0.9999</b> |
| H             | NMRPeak-R-S2M-SME                                     | 0.8990        | 0.9766        | 0.9854        |
|               | NMRPeak-R-S2M-SSE                                     | 0.9309        | 0.9784        | 0.9852        |
|               | NMRPeak-R-S2M-SSR                                     | 0.9284        | 0.9720        | 0.9792        |
|               | NMRPeak-R-S2M-Combine (0.2,0.2,0.6)                   | <b>0.9475</b> | <b>0.9824</b> | <b>0.9875</b> |
| HF            | NMRPeak-R-S2M-SME                                     | 0.9881        | 0.9994        | 0.9997        |
|               | NMRPeak-R-S2M-SSE                                     | 0.9901        | 0.9995        | 0.9997        |
|               | NMRPeak-R-S2M-SSR                                     | 0.9887        | 0.9993        | 0.9997        |
|               | NMRPeak-R-S2M-Combine (0.4,0.1,0.5)                   | <b>0.9920</b> | <b>0.9996</b> | <b>0.9998</b> |
| CH            | NMRPeak-R-S2M-SME                                     | 0.9664        | 0.9927        | 0.9950        |
|               | NMRPeak-R-S2M-SSE                                     | 0.9721        | 0.9921        | 0.9945        |
|               | NMRPeak-R-S2M-SSR                                     | 0.9885        | 0.9957        | 0.9967        |
|               | NMRPeak-R-S2M-Combine (0.1,0.0,0.9; $\lambda = 0.5$ ) | <b>0.9894</b> | <b>0.9966</b> | <b>0.9973</b> |
| CHF           | NMRPeak-R-S2M-SME                                     | 0.9922        | 0.9999        | 0.9999        |
|               | NMRPeak-R-S2M-SSE                                     | 0.9936        | 0.9999        | 0.9999        |
|               | NMRPeak-R-S2M-SSR                                     | 0.9968        | 0.9999        | 1.0000        |
|               | NMRPeak-R-S2M-Combine (0.0,0.1,0.9; $\lambda = 0.6$ ) | <b>0.9970</b> | <b>1.0000</b> | <b>1.0000</b> |

C and H correspond to  $^{13}\text{C}$  and  $^1\text{H}$  NMR peaks, respectively. F denotes molecular formula constraints. Combine denotes the best-performing linear combination of SME, SSE, and SSR with coefficients  $(\alpha, \beta, \gamma)$ . For CH and CHF inputs,  $\lambda$  denotes the weighting factor between  $^{13}\text{C}$  and  $^1\text{H}$  modalities in SSR. For single-modality inputs,  $\lambda = 0$ .

**Supplementary Table 10.** Generation accuracy of NMRPeak-G with beam size = 100 on the NMRexp [4] test set. Stereochemistry-aware accuracy (Isomer = True) is compared against topology-only accuracy (Isomer = False) from top-1 to top-100 candidates.

| Modality | Setting      | Top-1  | Top-5  | Top-10 | Top-20 | Top-50 | Top-100 |
|----------|--------------|--------|--------|--------|--------|--------|---------|
| C        | Isomer=True  | 0.4240 | 0.6166 | 0.6621 | 0.6981 | 0.7370 | 0.7618  |
|          | Isomer=False | 0.4849 | 0.6368 | 0.6791 | 0.7132 | 0.7505 | 0.7741  |
| CF       | Isomer=True  | 0.5899 | 0.7951 | 0.8330 | 0.8607 | 0.8863 | 0.8971  |
|          | Isomer=False | 0.6667 | 0.8178 | 0.8513 | 0.8763 | 0.9003 | 0.9103  |
| H        | Isomer=True  | 0.4379 | 0.6402 | 0.6908 | 0.7280 | 0.7688 | 0.7939  |
|          | Isomer=False | 0.4960 | 0.6639 | 0.7097 | 0.7448 | 0.7832 | 0.8074  |
| HF       | Isomer=True  | 0.6111 | 0.8093 | 0.8465 | 0.8719 | 0.8945 | 0.9045  |
|          | Isomer=False | 0.6866 | 0.8351 | 0.8671 | 0.8899 | 0.9103 | 0.9194  |
| CH       | Isomer=True  | 0.6389 | 0.8199 | 0.8504 | 0.8729 | 0.8939 | 0.9043  |
|          | Isomer=False | 0.7152 | 0.8444 | 0.8694 | 0.8889 | 0.9075 | 0.9170  |
| CHF      | Isomer=True  | 0.7129 | 0.8798 | 0.9039 | 0.9200 | 0.9339 | 0.9395  |
|          | Isomer=False | 0.7955 | 0.9057 | 0.9246 | 0.9375 | 0.9491 | 0.9537  |

C and H correspond to  $^{13}\text{C}$  and  $^1\text{H}$  NMR peaks, respectively. F denotes molecular formula constraints.

**Supplementary Table 11.** Generation accuracy of NMRPeak-G with beam size = 10, trained on MST-NMR [5] dataset and evaluated on the MST-NMR test set.

| Modality | Variant            | Top-1         | Top-5         | Top-10        |
|----------|--------------------|---------------|---------------|---------------|
| C        | MST [5] (baseline) | 0.3637        | 0.5226        | 0.5594        |
|          | NMRPeak-G-Raw      | <b>0.5123</b> | <b>0.6817</b> | <b>0.7114</b> |
| CF       | MST [5] (baseline) | 0.4869        | 0.6656        | 0.7002        |
|          | NMRPeak-G-Raw      | <b>0.6348</b> | <b>0.8060</b> | <b>0.8276</b> |
| H        | MST [5] (baseline) | 0.5078        | 0.6696        | 0.7020        |
|          | NMRPeak-G-Raw      | <b>0.5879</b> | <b>0.7580</b> | <b>0.7882</b> |
| HF       | MST [5] (baseline) | 0.6322        | 0.7900        | 0.8163        |
|          | NMRPeak-G-Raw      | <b>0.7265</b> | <b>0.8748</b> | <b>0.8905</b> |
| CH       | MST [5] (baseline) | 0.6474        | 0.8021        | 0.8246        |
|          | NMRPeak-G-Raw      | <b>0.7515</b> | <b>0.8898</b> | <b>0.9068</b> |
| CHF      | MST [5] (baseline) | 0.6977        | 0.8445        | 0.8652        |
|          | NMRPeak-G-Raw      | <b>0.7965</b> | <b>0.9209</b> | <b>0.9325</b> |

MST [5] (baseline) refers to results obtained by training the model from scratch using the official source code released by the authors.

Only stereochemistry-aware accuracy (Isomer = True) is reported. Topology-only results are omitted for clarity but follow similar trends.

C and H correspond to  $^{13}\text{C}$  and  $^1\text{H}$  NMR peaks, respectively. F denotes molecular formula constraints.

Raw denotes generation results without re-ranking.

**Supplementary Table 12.** Generation accuracy of NMRPeak-G with beam size = 10, trained on MST-NMR [5] dataset and evaluated on the NMRexp test set.

| Modality | Variant            | Top-1         | Top-5         | Top-10        |
|----------|--------------------|---------------|---------------|---------------|
| C        | MST [5] (baseline) | 0.0168        | 0.0328        | 0.0402        |
|          | NMRPeak-G-Raw      | <b>0.0283</b> | <b>0.0527</b> | <b>0.0624</b> |
| CF       | MST [5] (baseline) | 0.0641        | 0.1194        | 0.1379        |
|          | NMRPeak-G-Raw      | <b>0.1002</b> | <b>0.1768</b> | <b>0.1977</b> |
| H        | MST [5] (baseline) | 0.0036        | 0.0080        | 0.0109        |
|          | NMRPeak-G-Raw      | <b>0.0065</b> | <b>0.0141</b> | <b>0.0183</b> |
| HF       | MST [5] (baseline) | 0.0343        | 0.0665        | 0.0784        |
|          | NMRPeak-G-Raw      | <b>0.0533</b> | <b>0.1008</b> | <b>0.1155</b> |
| CH       | MST [5] (baseline) | 0.0307        | 0.0572        | 0.0678        |
|          | NMRPeak-G-Raw      | <b>0.0515</b> | <b>0.0931</b> | <b>0.1098</b> |
| CHF      | MST [5] (baseline) | 0.0757        | 0.1336        | 0.1527        |
|          | NMRPeak-G-Raw      | <b>0.1227</b> | <b>0.2097</b> | <b>0.2306</b> |

MST [5] (baseline) refers to results obtained by training the model from scratch using the official source code released by the authors.

Only stereochemistry-aware accuracy (Isomer = True) is reported. Topology-only results are omitted for clarity but follow similar trends.

C and H correspond to  $^{13}\text{C}$  and  $^1\text{H}$  NMR peaks, respectively. F denotes molecular formula constraints.

Raw denotes generation results without re-ranking.

**Supplementary Table 13.** Generation accuracy of NMRPeak-G with beam size = 10, trained on NMRexp [4] dataset and evaluated on the NMRexp test set

| Modality | Variant                                                  | Top-1         | Top-5         | Top-10        |
|----------|----------------------------------------------------------|---------------|---------------|---------------|
| C        | MST [5] (baseline)                                       | 0.3042        | 0.4659        | 0.5029        |
|          | NMRPeak-G-Raw                                            | 0.4227        | 0.6116        | 0.6474        |
|          | NMRPeak-G-Rerank-Base                                    | 0.4227        | 0.6128        | 0.6474        |
|          | NMRPeak-G-Rerank-SME                                     | 0.4100        | 0.6348        | 0.6474        |
|          | NMRPeak-G-Rerank-SSE                                     | 0.4536        | 0.6362        | 0.6474        |
|          | NMRPeak-G-Rerank-SSR                                     | 0.5117        | 0.6425        | 0.6474        |
|          | NMRPeak-G-Rerank-Combine (0.0,0.0,1.0)                   | <b>0.5117</b> | <b>0.6425</b> | <b>0.6474</b> |
| CF       | MST [5] (baseline)                                       | 0.4645        | 0.6631        | 0.7001        |
|          | NMRPeak-G-Raw                                            | 0.5894        | 0.7898        | 0.8155        |
|          | NMRPeak-G-Rerank-Base                                    | 0.6044        | 0.8015        | 0.8155        |
|          | NMRPeak-G-Rerank-SME                                     | 0.5784        | 0.8096        | 0.8155        |
|          | NMRPeak-G-Rerank-SSE                                     | 0.6203        | 0.8105        | 0.8155        |
|          | NMRPeak-G-Rerank-SSR                                     | 0.6664        | 0.8131        | 0.8155        |
|          | NMRPeak-G-Rerank-Combine (0.0,0.0,1.0)                   | <b>0.6664</b> | <b>0.8131</b> | <b>0.8155</b> |
| H        | MST [5] (baseline)                                       | 0.3299        | 0.5000        | 0.5406        |
|          | NMRPeak-G-Raw                                            | 0.4373        | 0.6361        | 0.6790        |
|          | NMRPeak-G-Rerank-Base                                    | 0.4373        | 0.6375        | 0.6790        |
|          | NMRPeak-G-Rerank-SME                                     | 0.3349        | 0.6532        | 0.6790        |
|          | NMRPeak-G-Rerank-SSE                                     | 0.4356        | 0.6632        | 0.6790        |
|          | NMRPeak-G-Rerank-SSR                                     | 0.4500        | 0.6634        | 0.6790        |
|          | NMRPeak-G-Rerank-Combine (0.0,0.7,0.3)                   | <b>0.4626</b> | <b>0.6658</b> | <b>0.6790</b> |
| HF       | MST [5] (baseline)                                       | 0.5130        | 0.7078        | 0.7422        |
|          | NMRPeak-G-Raw                                            | 0.6109        | 0.8052        | 0.8320        |
|          | NMRPeak-G-Rerank-Base                                    | 0.6264        | 0.8190        | 0.8320        |
|          | NMRPeak-G-Rerank-SME                                     | 0.5337        | 0.8229        | 0.8320        |
|          | NMRPeak-G-Rerank-SSE                                     | 0.6116        | 0.8258        | 0.8320        |
|          | NMRPeak-G-Rerank-SSR                                     | 0.6263        | 0.8263        | 0.8320        |
|          | NMRPeak-G-Rerank-Combine (0.0,0.5,0.5)                   | <b>0.6365</b> | <b>0.8271</b> | <b>0.8320</b> |
| CH       | MST [5] (baseline)                                       | 0.5222        | 0.7034        | 0.7351        |
|          | NMRPeak-G-Raw                                            | 0.6384        | 0.8177        | 0.8430        |
|          | NMRPeak-G-Rerank-Base                                    | 0.6385        | 0.8202        | 0.8430        |
|          | NMRPeak-G-Rerank-SME                                     | 0.5304        | 0.8343        | 0.8430        |
|          | NMRPeak-G-Rerank-SSE                                     | 0.6038        | 0.8360        | 0.8430        |
|          | NMRPeak-G-Rerank-SSR                                     | 0.6868        | 0.8404        | 0.8430        |
|          | NMRPeak-G-Rerank-Combine (0.0,0.0,1.0; $\lambda = 0.7$ ) | <b>0.6868</b> | <b>0.8404</b> | <b>0.8430</b> |
| CHF      | MST [5] (baseline)                                       | 0.6093        | 0.7903        | 0.8164        |
|          | NMRPeak-G-Raw                                            | 0.7129        | 0.8779        | 0.8963        |
|          | NMRPeak-G-Rerank-Base                                    | 0.7272        | 0.8890        | 0.8963        |
|          | NMRPeak-G-Rerank-SME                                     | 0.6121        | 0.8906        | 0.8963        |
|          | NMRPeak-G-Rerank-SSE                                     | 0.6743        | 0.8919        | 0.8963        |
|          | NMRPeak-G-Rerank-SSR                                     | 0.7522        | 0.8949        | 0.8963        |
|          | NMRPeak-G-Rerank-Combine (0.0,0.0,1.0; $\lambda = 1.0$ ) | <b>0.7522</b> | <b>0.8949</b> | <b>0.8963</b> |

MST [5] (baseline) refers to results obtained by training the model from scratch using the official source code released by the authors.

Only stereochemistry-aware accuracy (Isomer = True) is reported. Topology-only results are omitted for clarity but follow similar trends.

C and H correspond to  $^{13}\text{C}$  and  $^1\text{H}$  NMR peaks, respectively. F denotes molecular formula constraints.

Raw denotes generation results without re-ranking. Base denotes the default re-ranking configuration, where generated candidates are filtered by removing invalid or duplicate SMILES using RDKit [6] validation, and molecular formula constraints (when available) are enforced to further prune the candidate space before re-ranking.

Combine denotes the best-performing linear combination of SME, SSE, and SSR with coefficients ( $\alpha, \beta, \gamma$ ). For CH and CHF inputs,  $\lambda$  denotes the weighting factor between  $^{13}\text{C}$  and  $^1\text{H}$  modalities in SSR. For single-modality inputs,  $\lambda = 0$ .

**Supplementary Table 14.** Generation accuracy of NMRPeak-G with beam size = 10, trained on NMRexp [4] dataset and evaluated on the NMRexp test set simulated by NMRPeak-P-Single.

| Modality | Variant            | Top-1         | Top-5         | Top-10        |
|----------|--------------------|---------------|---------------|---------------|
| C        | MST [5] (baseline) | 0.3232        | 0.4967        | 0.5349        |
|          | NMRPeak-G-Raw      | <b>0.4535</b> | <b>0.6514</b> | <b>0.6874</b> |
| CF       | MST [5] (baseline) | 0.4879        | 0.6945        | 0.7316        |
|          | NMRPeak-G-Raw      | <b>0.6197</b> | <b>0.8216</b> | <b>0.8454</b> |
| H        | MST [5] (baseline) | 0.3543        | 0.5415        | 0.5846        |
|          | NMRPeak-G-Raw      | <b>0.4909</b> | <b>0.7034</b> | <b>0.7439</b> |
| HF       | MST [5] (baseline) | 0.5489        | 0.7502        | 0.7832        |
|          | NMRPeak-G-Raw      | <b>0.6600</b> | <b>0.8501</b> | <b>0.8737</b> |
| CH       | MST [5] (baseline) | 0.5599        | 0.7458        | 0.7771        |
|          | NMRPeak-G-Raw      | <b>0.6801</b> | <b>0.8593</b> | <b>0.8820</b> |
| CHF      | MST [5] (baseline) | 0.6419        | 0.8226        | 0.8474        |
|          | NMRPeak-G-Raw      | <b>0.7473</b> | <b>0.9067</b> | <b>0.9222</b> |

MST [5] (baseline) refers to results obtained by training the model from scratch using the official source code released by the authors.

Only stereochemistry-aware accuracy (Isomer = True) is reported. Topology-only results are omitted for clarity but follow similar trends.

C and H correspond to  $^{13}\text{C}$  and  $^1\text{H}$  NMR peaks, respectively. F denotes molecular formula constraints.

Raw denotes generation results without re-ranking.

**Supplementary Table 15.** Generation accuracy of NMRPeak-G with beam size = 10, trained on NMRexp [4] dataset and evaluated on the NMRexp test set simulated by NMRPeak-P-Multi.

| Modality | Variant            | Top-1         | Top-5         | Top-10        |
|----------|--------------------|---------------|---------------|---------------|
| C        | MST [5] (baseline) | 0.3283        | 0.4857        | 0.5422        |
|          | NMRPeak-G-Raw      | <b>0.4620</b> | <b>0.6620</b> | <b>0.6974</b> |
| CF       | MST [5] (baseline) | 0.4925        | 0.6992        | 0.7366        |
|          | NMRPeak-G-Raw      | <b>0.6256</b> | <b>0.8293</b> | <b>0.8526</b> |
| H        | MST [5] (baseline) | 0.3627        | 0.5521        | 0.5954        |
|          | NMRPeak-G-Raw      | <b>0.4983</b> | <b>0.7139</b> | <b>0.7541</b> |
| HF       | MST [5] (baseline) | 0.5574        | 0.7593        | 0.7915        |
|          | NMRPeak-G-Raw      | <b>0.6662</b> | <b>0.8570</b> | <b>0.8792</b> |
| CH       | MST [5] (baseline) | 0.5681        | 0.7581        | 0.7892        |
|          | NMRPeak-G-Raw      | <b>0.6888</b> | <b>0.8691</b> | <b>0.8914</b> |
| CHF      | MST [5] (baseline) | 0.6491        | 0.8307        | 0.8553        |
|          | NMRPeak-G-Raw      | <b>0.7542</b> | <b>0.9112</b> | <b>0.9261</b> |

MST [5] (baseline) refers to results obtained by training the model from scratch using the official source code released by the authors.

Only stereochemistry-aware accuracy (Isomer = True) is reported. Topology-only results are omitted for clarity but follow similar trends.

C and H correspond to  $^{13}\text{C}$  and  $^1\text{H}$  NMR peaks, respectively. F denotes molecular formula constraints.

Raw denotes generation results without re-ranking.

## 124 References

- 125 [1] Lewis, M., Liu, Y., Goyal, N., Ghazvininejad, M., Mohamed, A., Levy, O., Stoyanov, V.,  
126 Zettlemoyer, L.: Bart: Denoising sequence-to-sequence pre-training for natural language  
127 generation, translation, and comprehension. In: Proceedings of the 58th Annual Meeting  
128 of the Association for Computational Linguistics, pp. 7871–7880 (2020)
- 129 [2] Wadell, A., Bhutani, A., Viswanathan, V.: Smirk: An atomically complete tokenizer for  
130 molecular foundation models. arXiv preprint arXiv:2409.15370 (2024)
- 131 [3] Zhou, G., Gao, Z., Ding, Q., Zheng, H., Xu, H., Wei, Z., Zhang, L., Ke, G.: Uni-mol: A  
132 universal 3d molecular representation learning framework. In: The Eleventh International  
133 Conference on Learning Representations (2023)
- 134 [4] Wang, J.-J., Jin, Y., Zhi, C.-Y., Liu, Y.-J., Huang, X.-H., Xu, F., Ji, X., Fang, X., Tao,  
135 H., E, W., *et al.*: Nmrxp: A database of 3.3 million experimental nmr spectra. Scientific  
136 Data **12**(1), 1954 (2025)
- 137 [5] Alberts, M., Schilter, O., Zipoli, F., Hartrampf, N., Laino, T.: Unraveling molecular struc-  
138 ture: A multimodal spectroscopic dataset for chemistry. Advances in Neural Information  
139 Processing Systems **37**, 125780–125808 (2024)
- 140 [6] Landrum, G., Tosco, P., Kelley, B., Rodriguez, R., Cosgrove, D., Vianello, R., Gedeck,  
141 P., Jones, G., Kawashima, E., Nealschneider, D., *et al.*: rdkit/rdkit: 2025\_03\_1 (q1 2025)  
142 release. Zenodo (2025)
